# Supplementary material for: PHYTOCHROME INTERACTING FACTOR 7 moderates the activity and the cytosolic-nuclear shuttling of PHYTOCHROME A
Source: Research Square preprint supplement (doi:10.21203/rs.3.rs-7819683/v1), 2025-11-19
Supplement: Supplementary file 1 [file 715962e55572ba729cff004a.docx]

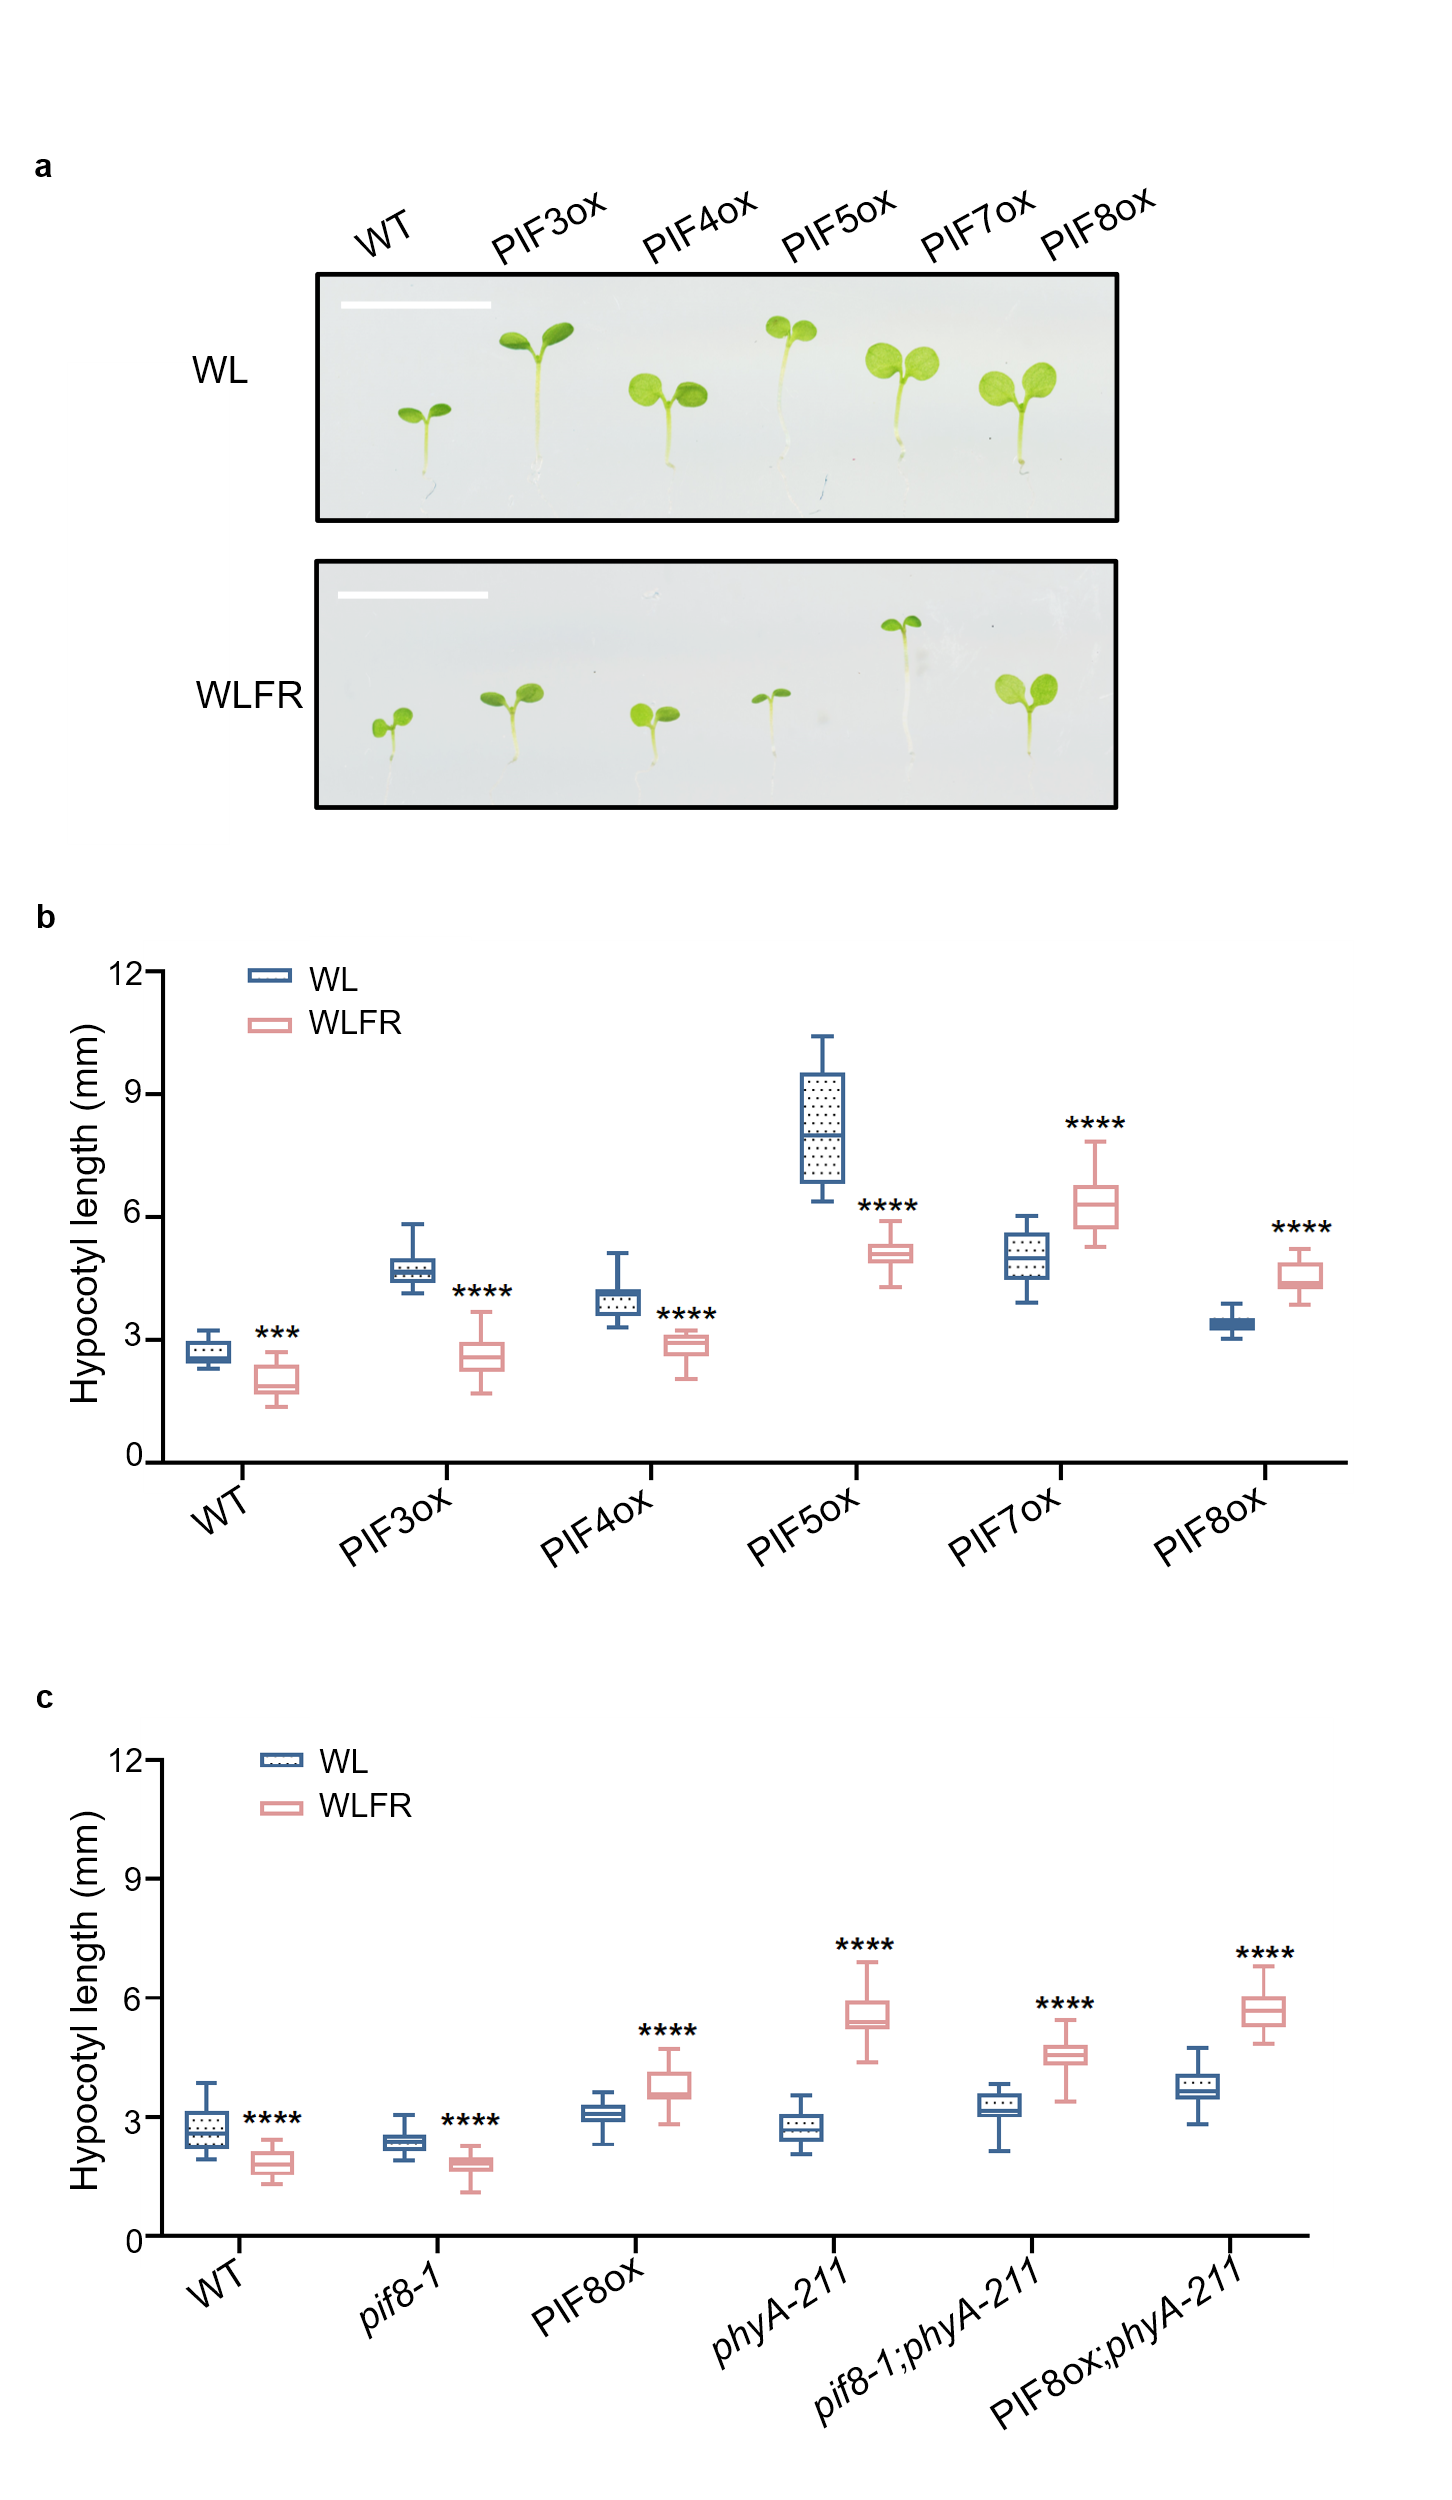


**S1 Hypocotyl length of PIF lines in WL and WLFR.**

**a**-**c**,Seedling images and hypocotyl length (mm) are shown. For **a**, scale bar =1 cm, For **b**,WT (Col-0)**,** *p35S::MYC-PIF8ox*, *PIF7ox-FLASH*, *p35S::PIF3-LUC*, *p35S::PIF5-HA* and *p35S::PIF4-LUC*, and **c**, WT (Col-0*)***,** *pif8-1*, *pif8;phyA-211* and PIF8ox;*phyA-211.* Lines were generatedas previously described15,16, 40,41.

Seedlings were grown for 6 days 8 h light (PAR = 85 ± 5 μmol m−2 s−1), 16 h dark photocycles (WL) or with supplementary FR (R:FR 0.20) (WLFR) at 22°C. Hypocotyl length was measured using ImageJ. Data are presented as mean values ± s.e.m., *n*=27 in **b**; *n*=28 in **c** (seedling numbers). A two-way ANOVA was conducted to assess statistical significance across light conditions for each genotype (α=0.05); asterisks denote significance relative to WL treatments: 0.1234 (ns), 0.0332 (*), 0.0021 (**), 0.0002 (***), *P* < 0.0001 (****).


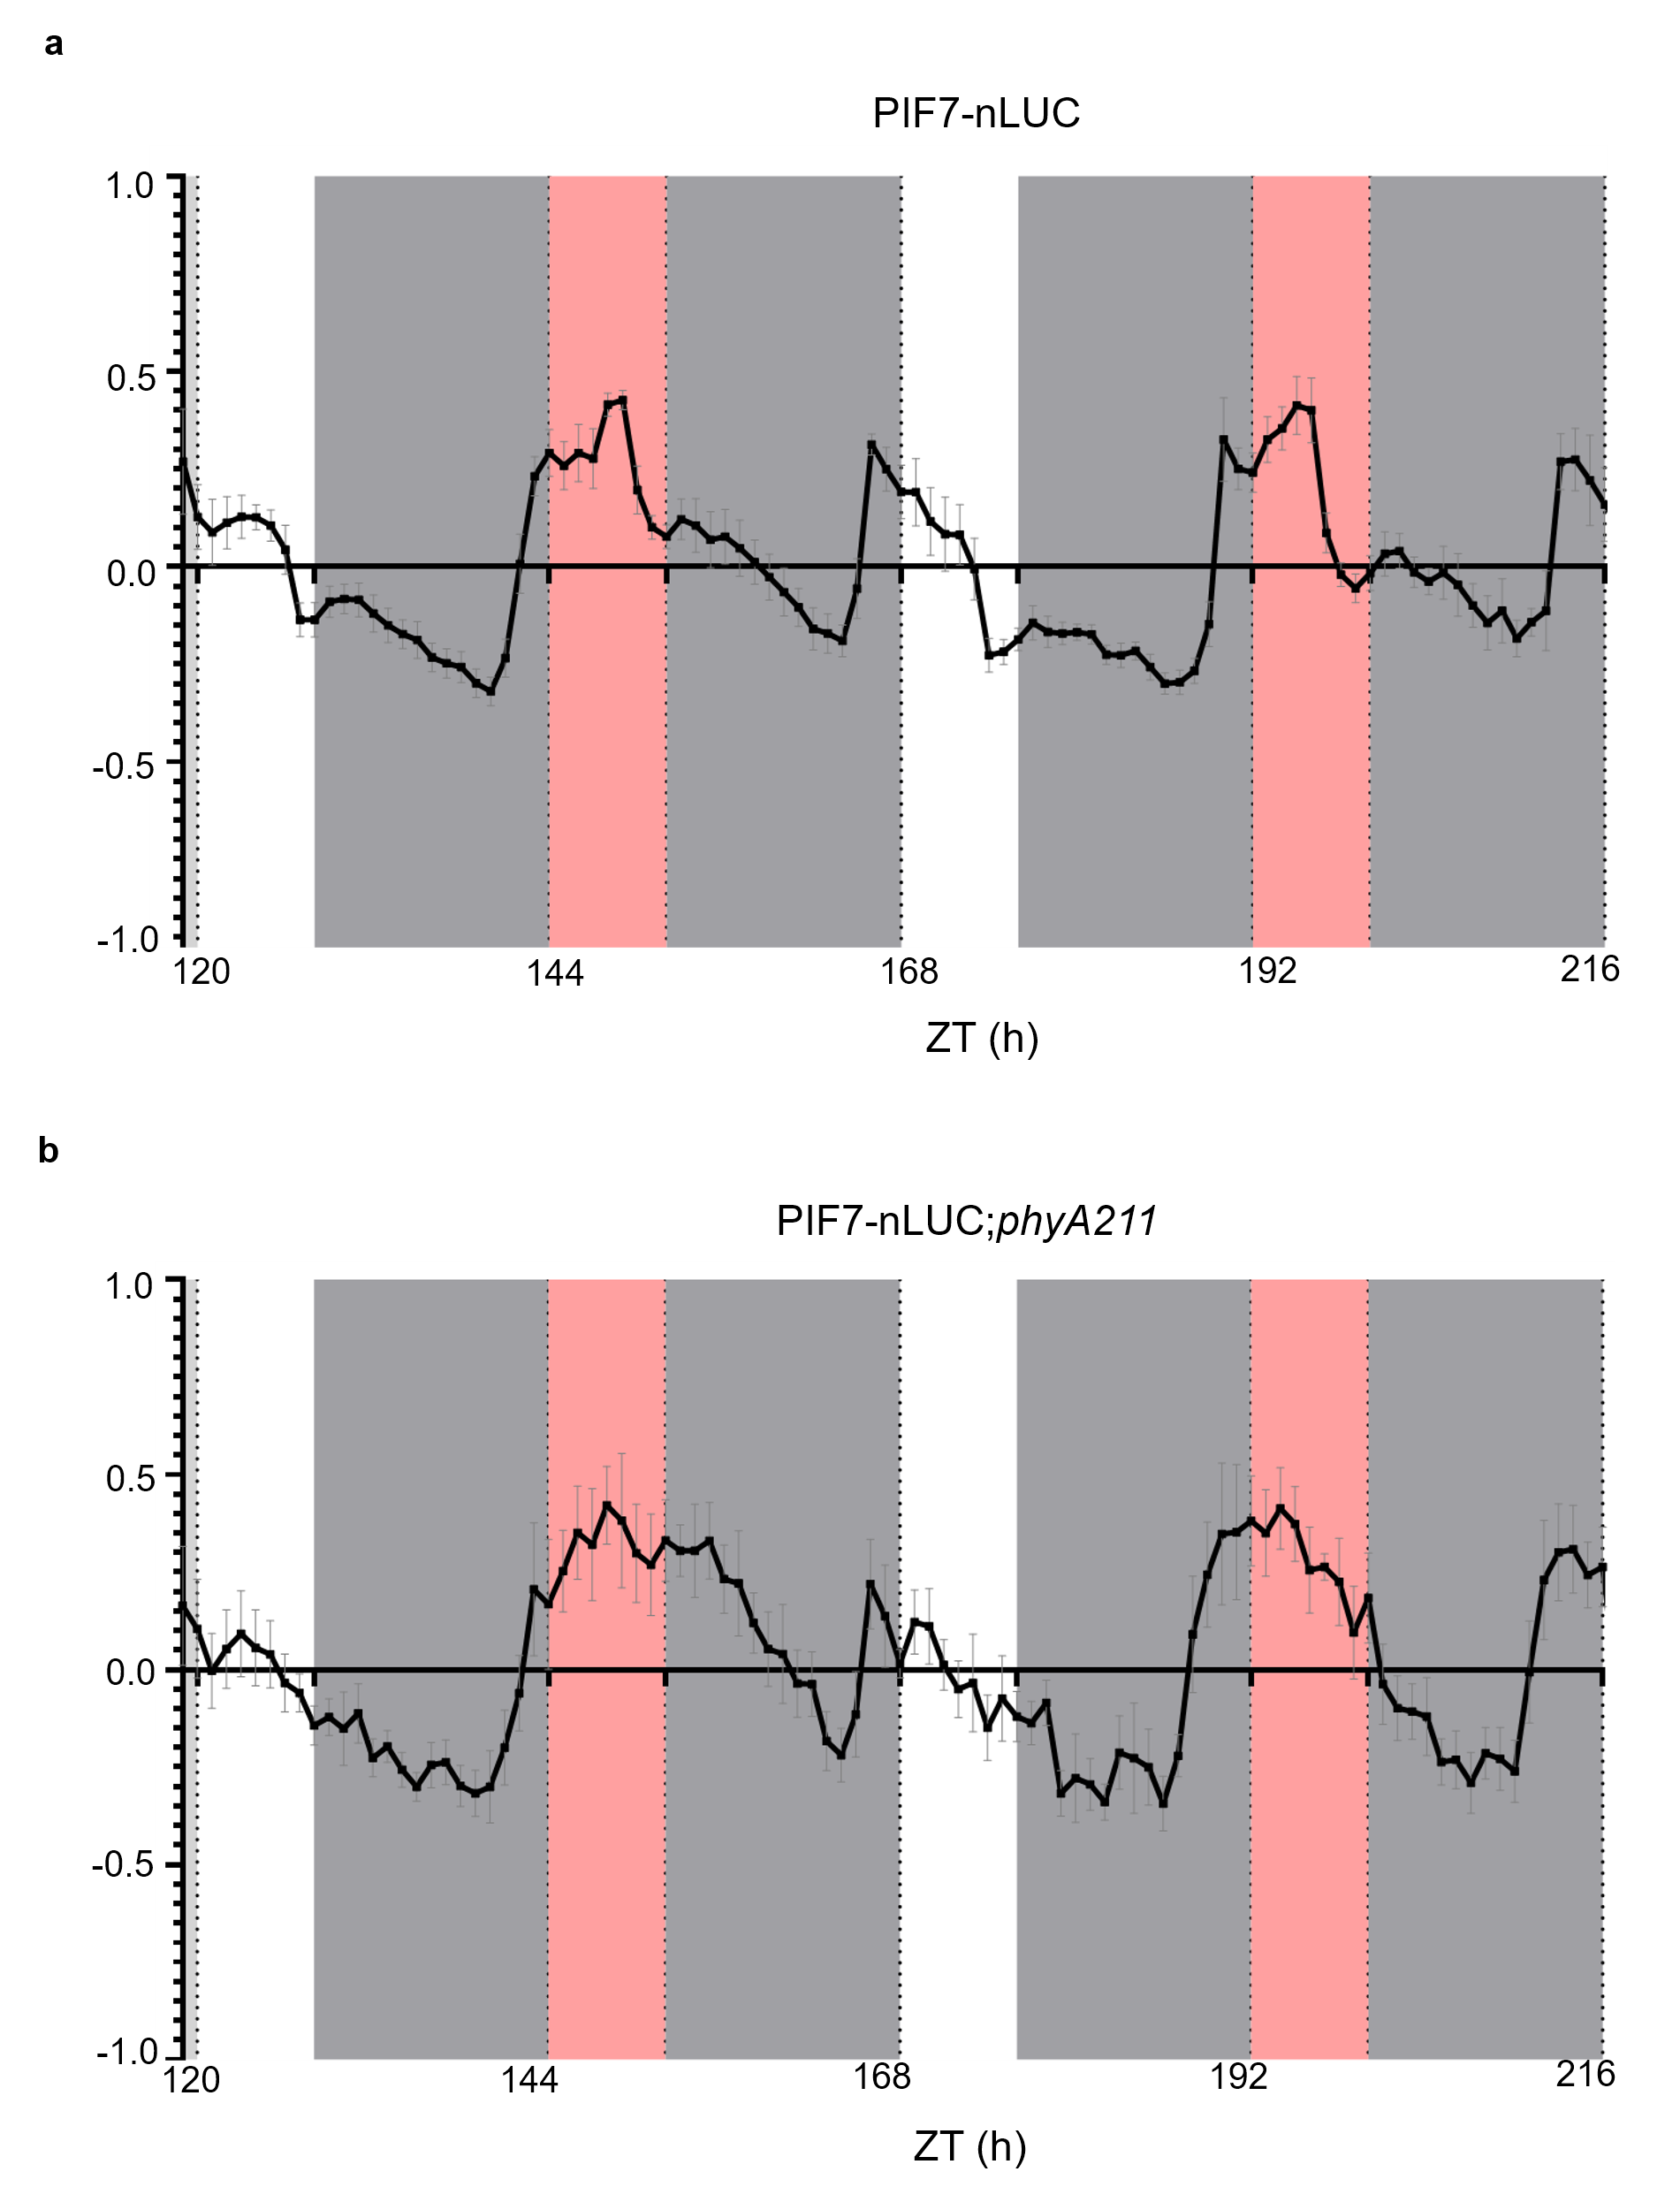


**S2 PIF7 protein expression changes rhythmically**.

Bioluminescence traces are shown for *pPIF7::PIF7-nanoLUC* (PIF7-nLUC, in the *pif7-1* background) and *pPIF7::PIF7-nanoLUC*;*phyA-211* (PIF7-nLUC;*phyA-211*) lines. Seedlings grown for 6d in 8hL:16hD before imaging over 3 days. Data shown are from over three consecutive days of treatment (*n*=5 biological replicates). White light (WL) periods are shown in while, red represents WLFR (R:FR 0.20), and grey represents darkness, PAR = 85 ± 5 μmol m−2 s−1. The raw data were analysed using BioDare2, and data are presented as mean values ± s.e.m, n=5 (seedling numbers). Representative images from three independent replicates are shown.


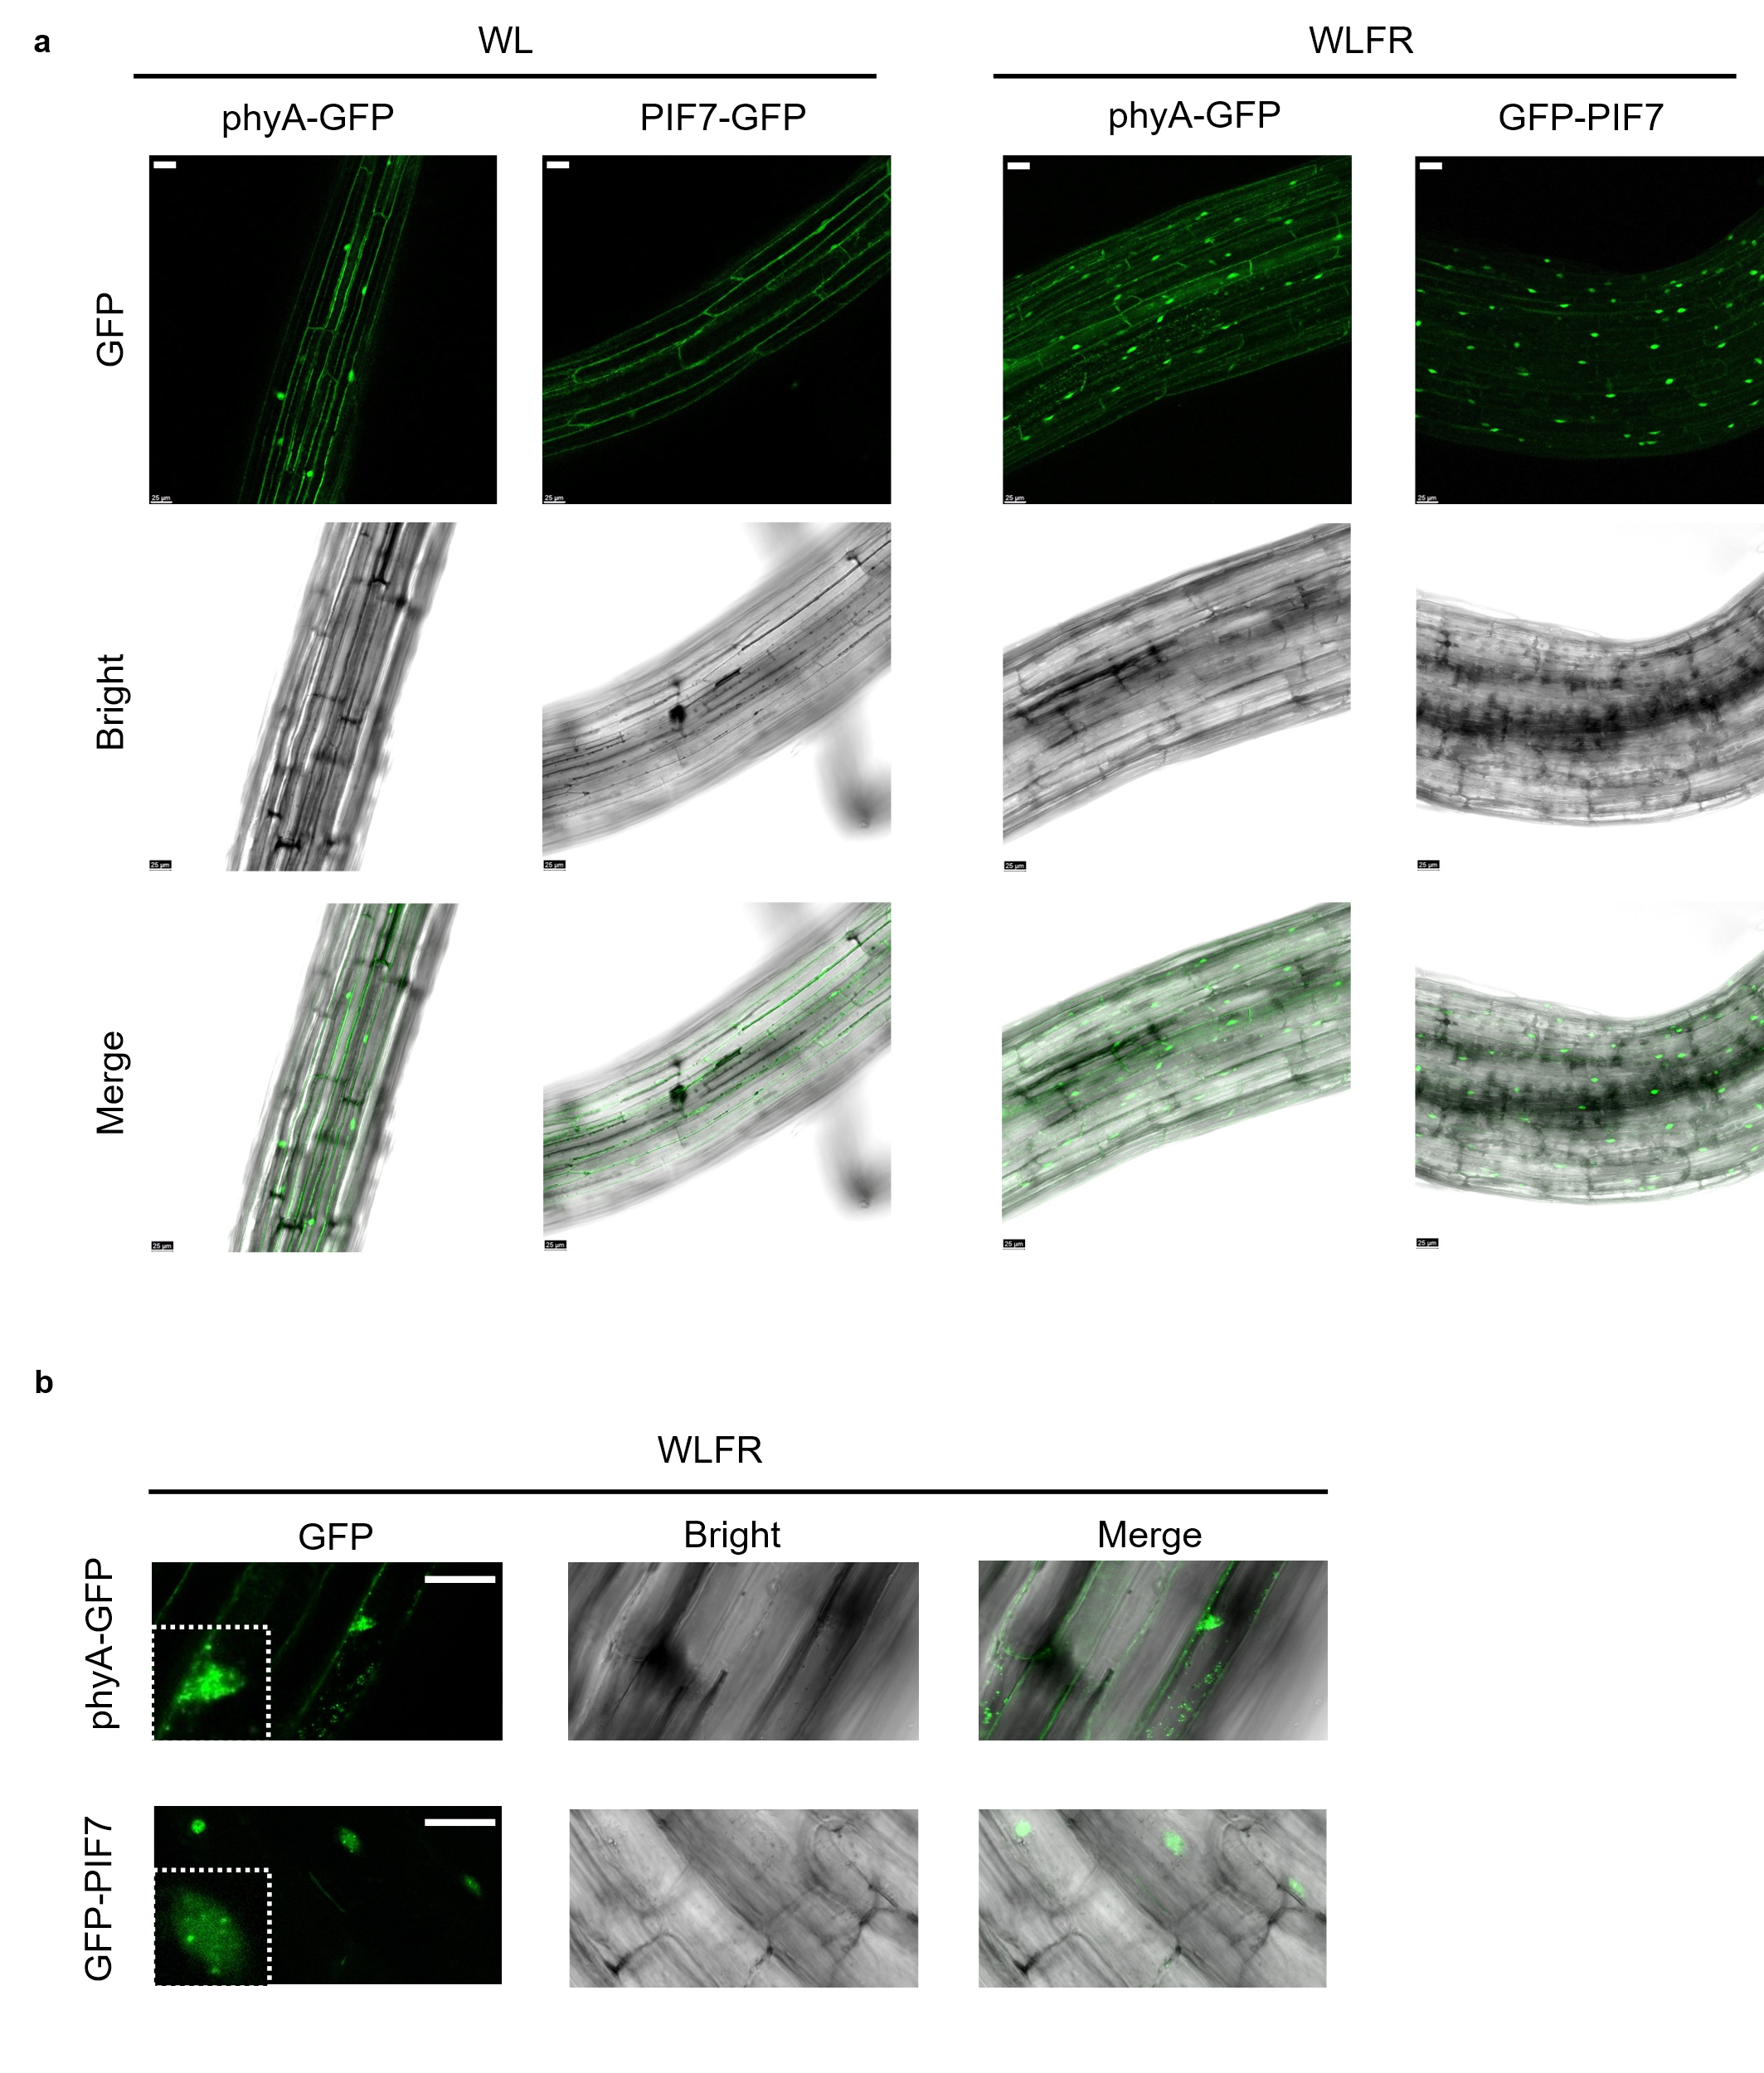


**S3 Both PIF7 and phyA accumulate in nuclei under WLFR conditions.**

**a**-**b**, Transgenic lines *pPHYA::PHYA-sGFP* and *p35S::GFP-PIF7* were analysed. phyA-GFP and GFP-PIF7 accumulated in nuclear photobodies following exposure to WLFR. GFP signals were detected using a 488 nm laser. Images were captured at ZT7 after 6 days of WL/WLFR treatments. Scale bar = 25 μm. Representative images from three independent replicates are shown.
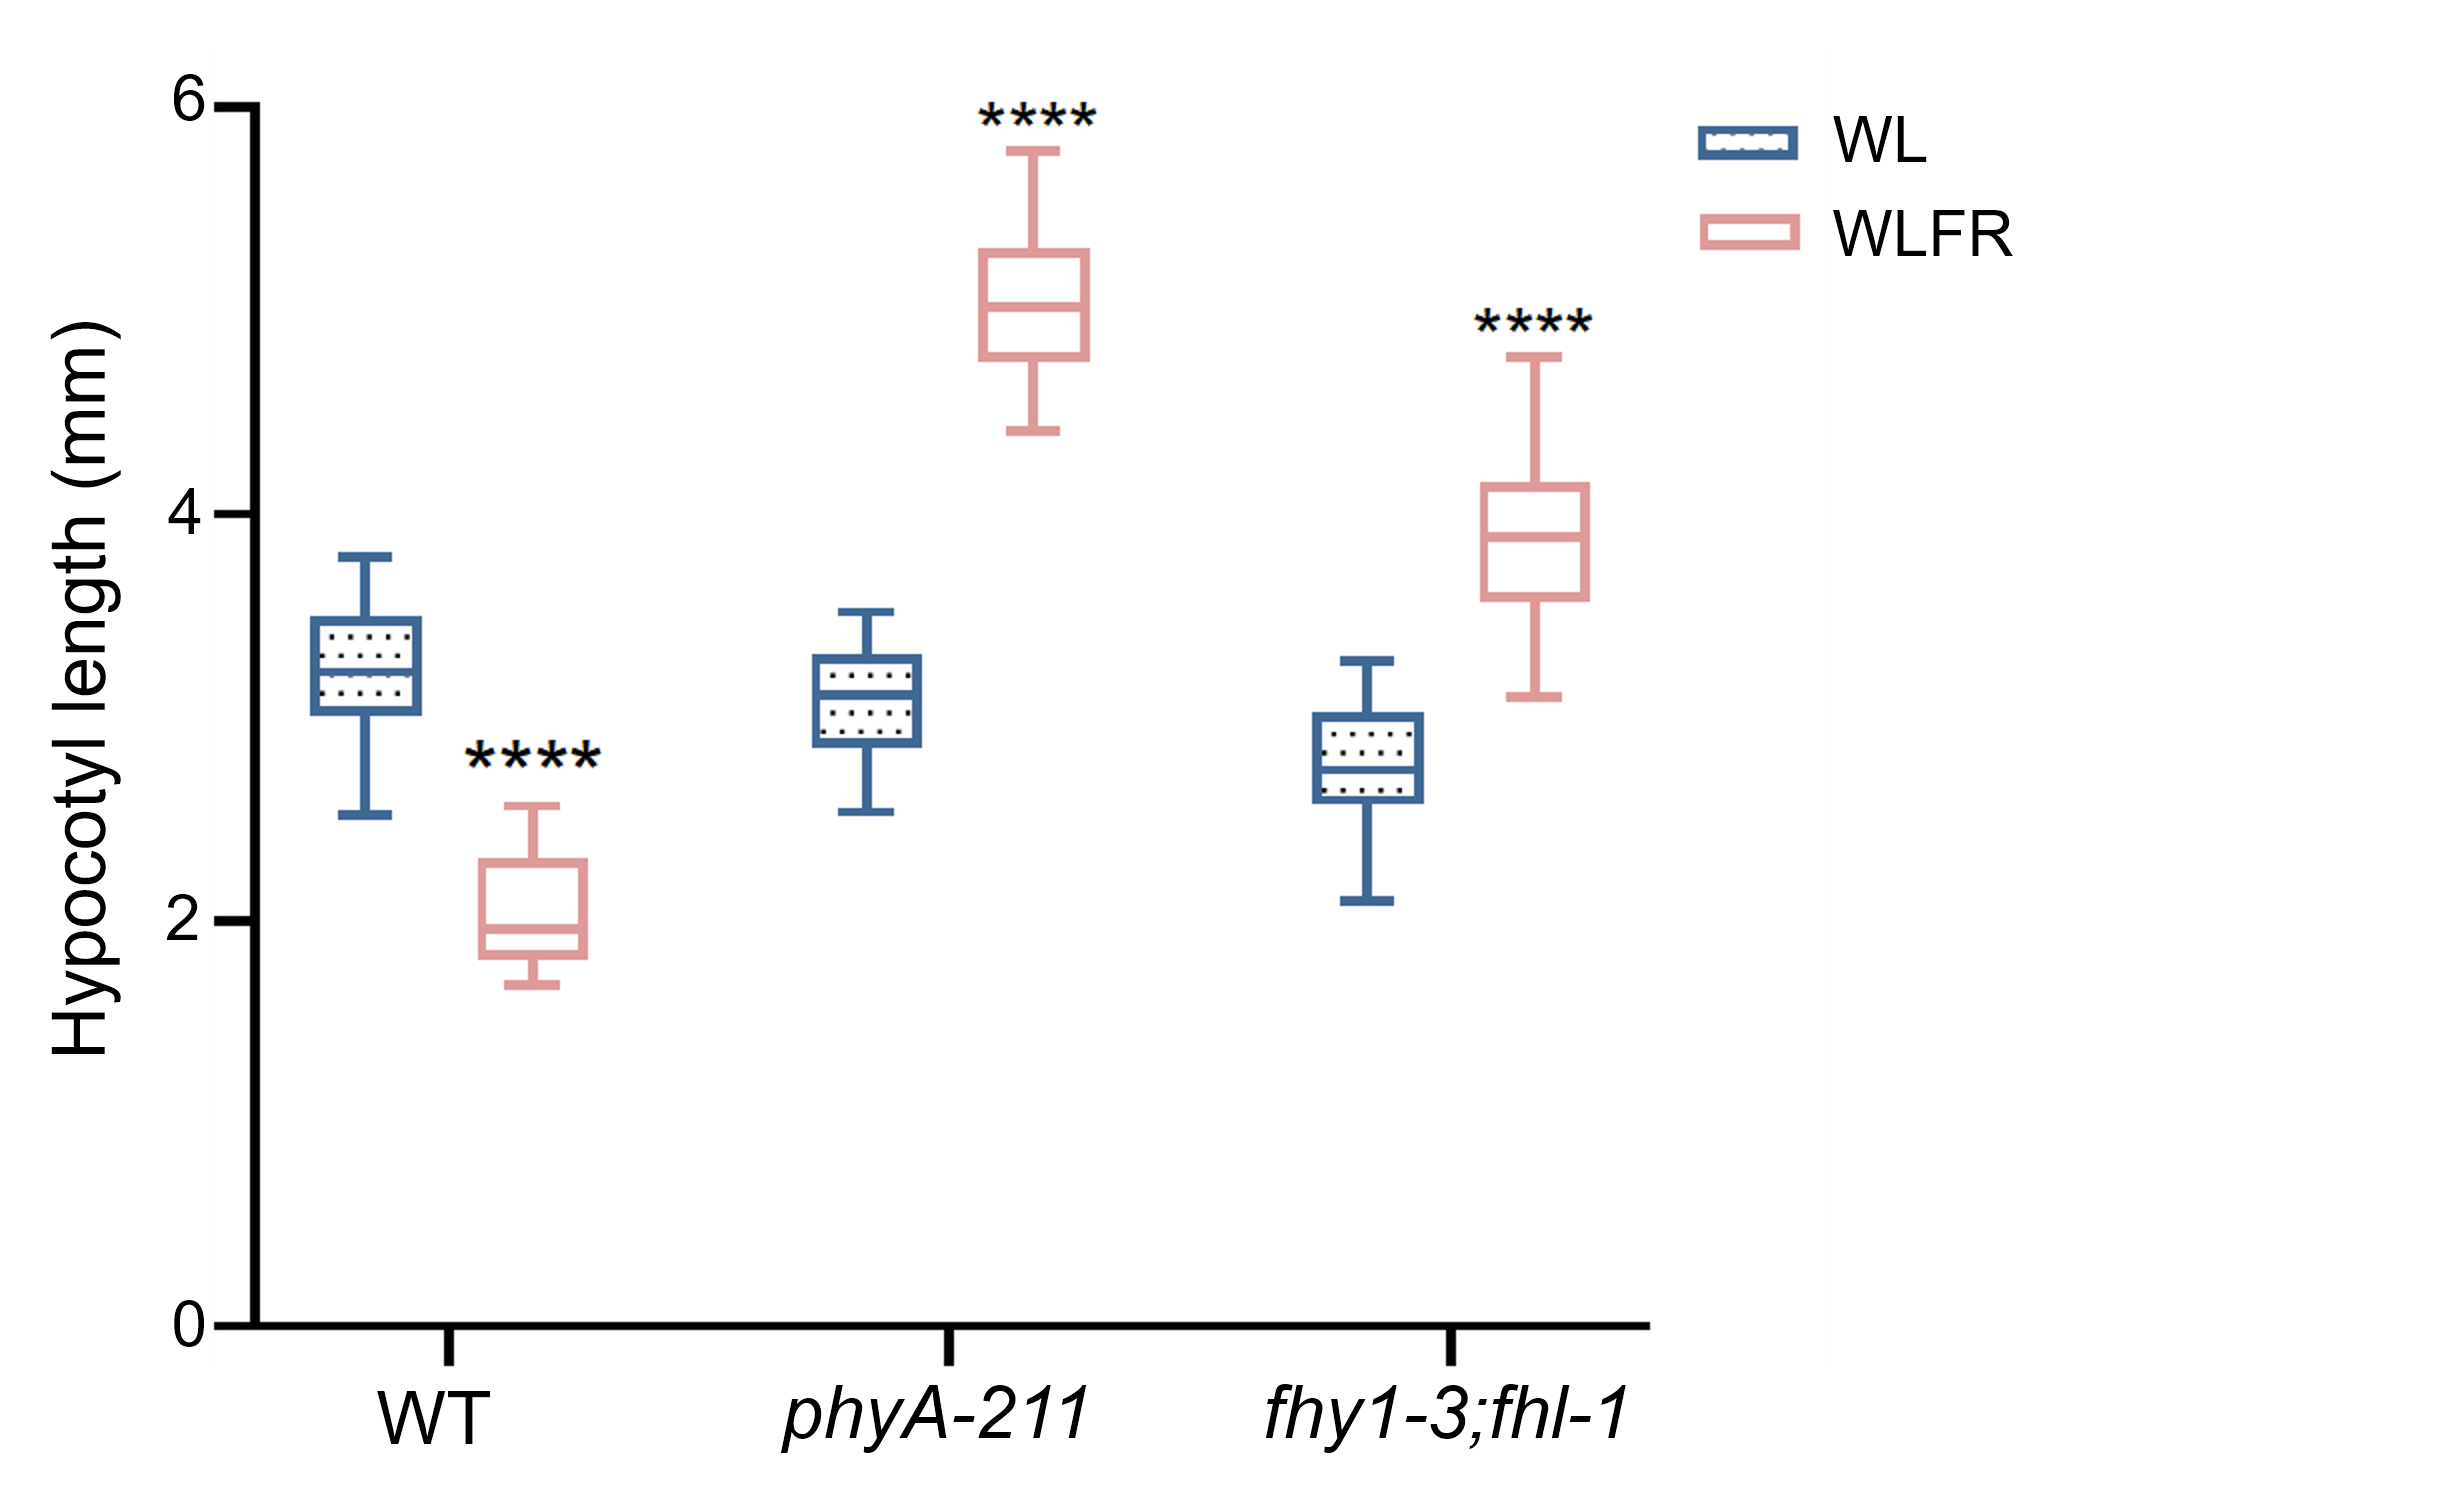


**S4 The *fhy1-3;fhl-1* is phenotypically similar to *phyA-211* in WLFR.**

Hypocotyl length (mm) of WT (Col-0), *phyA-211* and *fhy1-3;fhl-1 (fhl/fhy1-3)*47 double mutant under WL and WLFR. Data are presented as mean values ± s.e.m., *n*=25 (seedling numbers). A two-way ANOVA test assessed statistical significance (α=0.05); asterisks indicate significance compared to WL treatments in each genotype: 0.1234 (ns), 0.0332 (*), 0.0021 (**), 0.0002 (***), *P* < 0.0001 (****). Representative images from three independent replicates are shown.


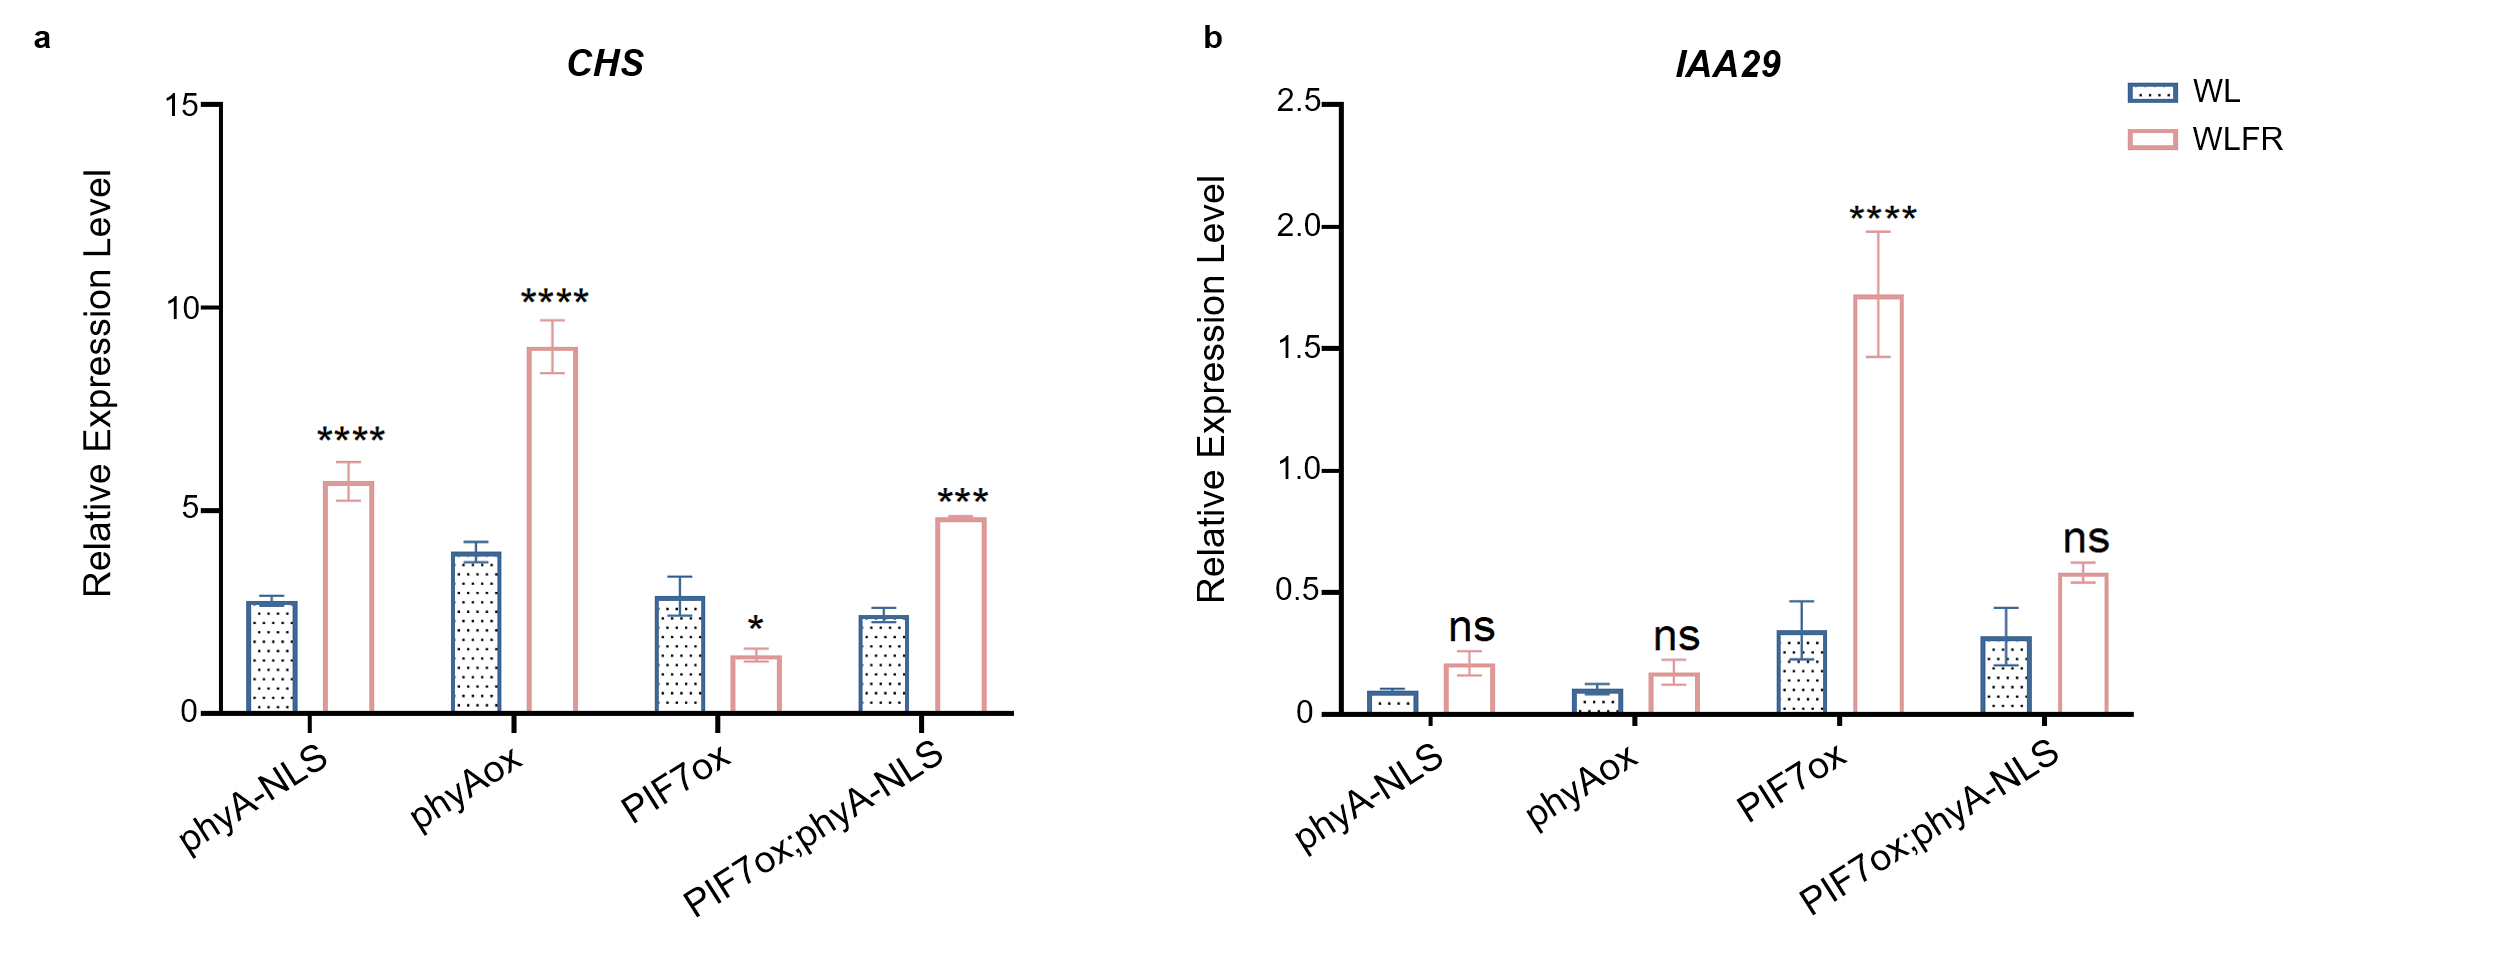


**S5 phyA-NLS restores phyA control of *CHS* and *IAA29* in PIF7ox seedlings.**

Relative expression of *CHS* and *IAA29* compared to *PP2A* internal control in phyA-NLS*;phyA-201*, phyAox, PIF7ox and PIF7ox;phyA*-*NLS*;phyA-201.* Samples were collected at ZT7 from 6d-old seedlings. Data are presented as mean values ± s.e.m., *n*=3 (biological repeats). A two-way ANOVA was conducted to assess statistical significance across light conditions for each genotype (α=0.05); asterisks denote significance relative to WL treatments: 0.1234 (ns), 0.0332 (*), 0.0021 (**), 0.0002 (***), P < 0.0001 (****).


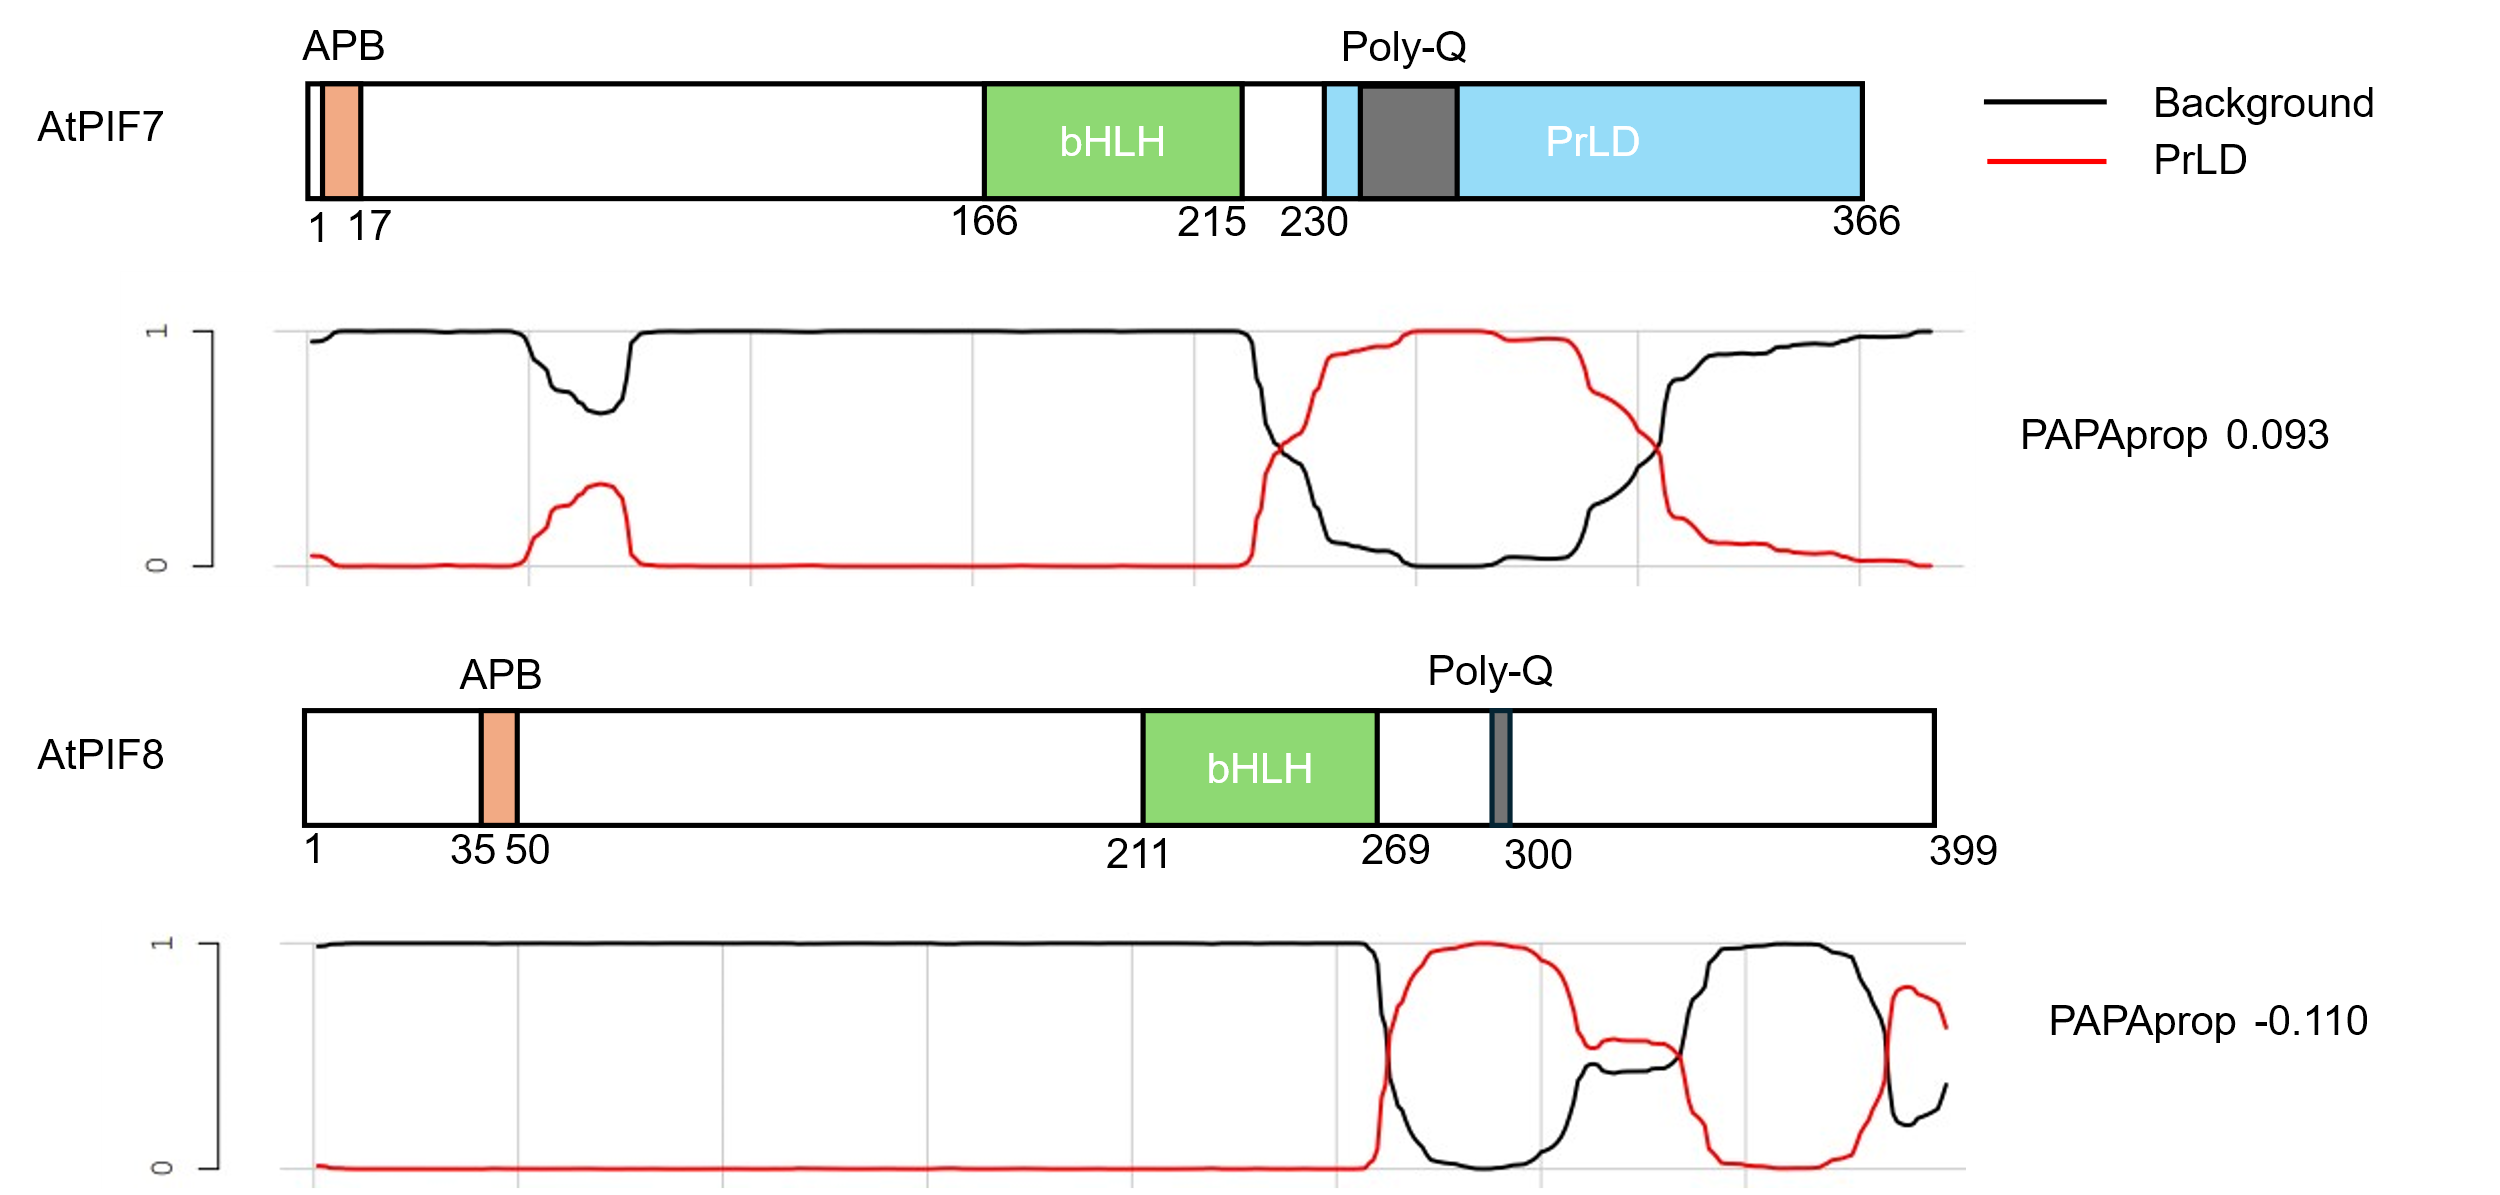


**S6 Prion-Like Amino Acid Composition Prediction.**

The Prion-Like Domain (PrLD) was predicted using the PLAAC tool: 'PLAAC: Finding Sequences with Prion-Like Amino Acid Composition' from MIT. PLAAC prediction (using *Arabidopsis thaliana* normalisation) applied to PIF7 and PIF8 protein structures; motif locations are shown in diagrams above. The red line traces indicate the PrLD prediction scores (ranging from 0 to 1), which rise in the C-terminal a regions of both genes, but most notably in PIF7. The PAPAprop score is a separate indicator of prion propensity, is higher ~0.01, again indicating the presence of PrLD.
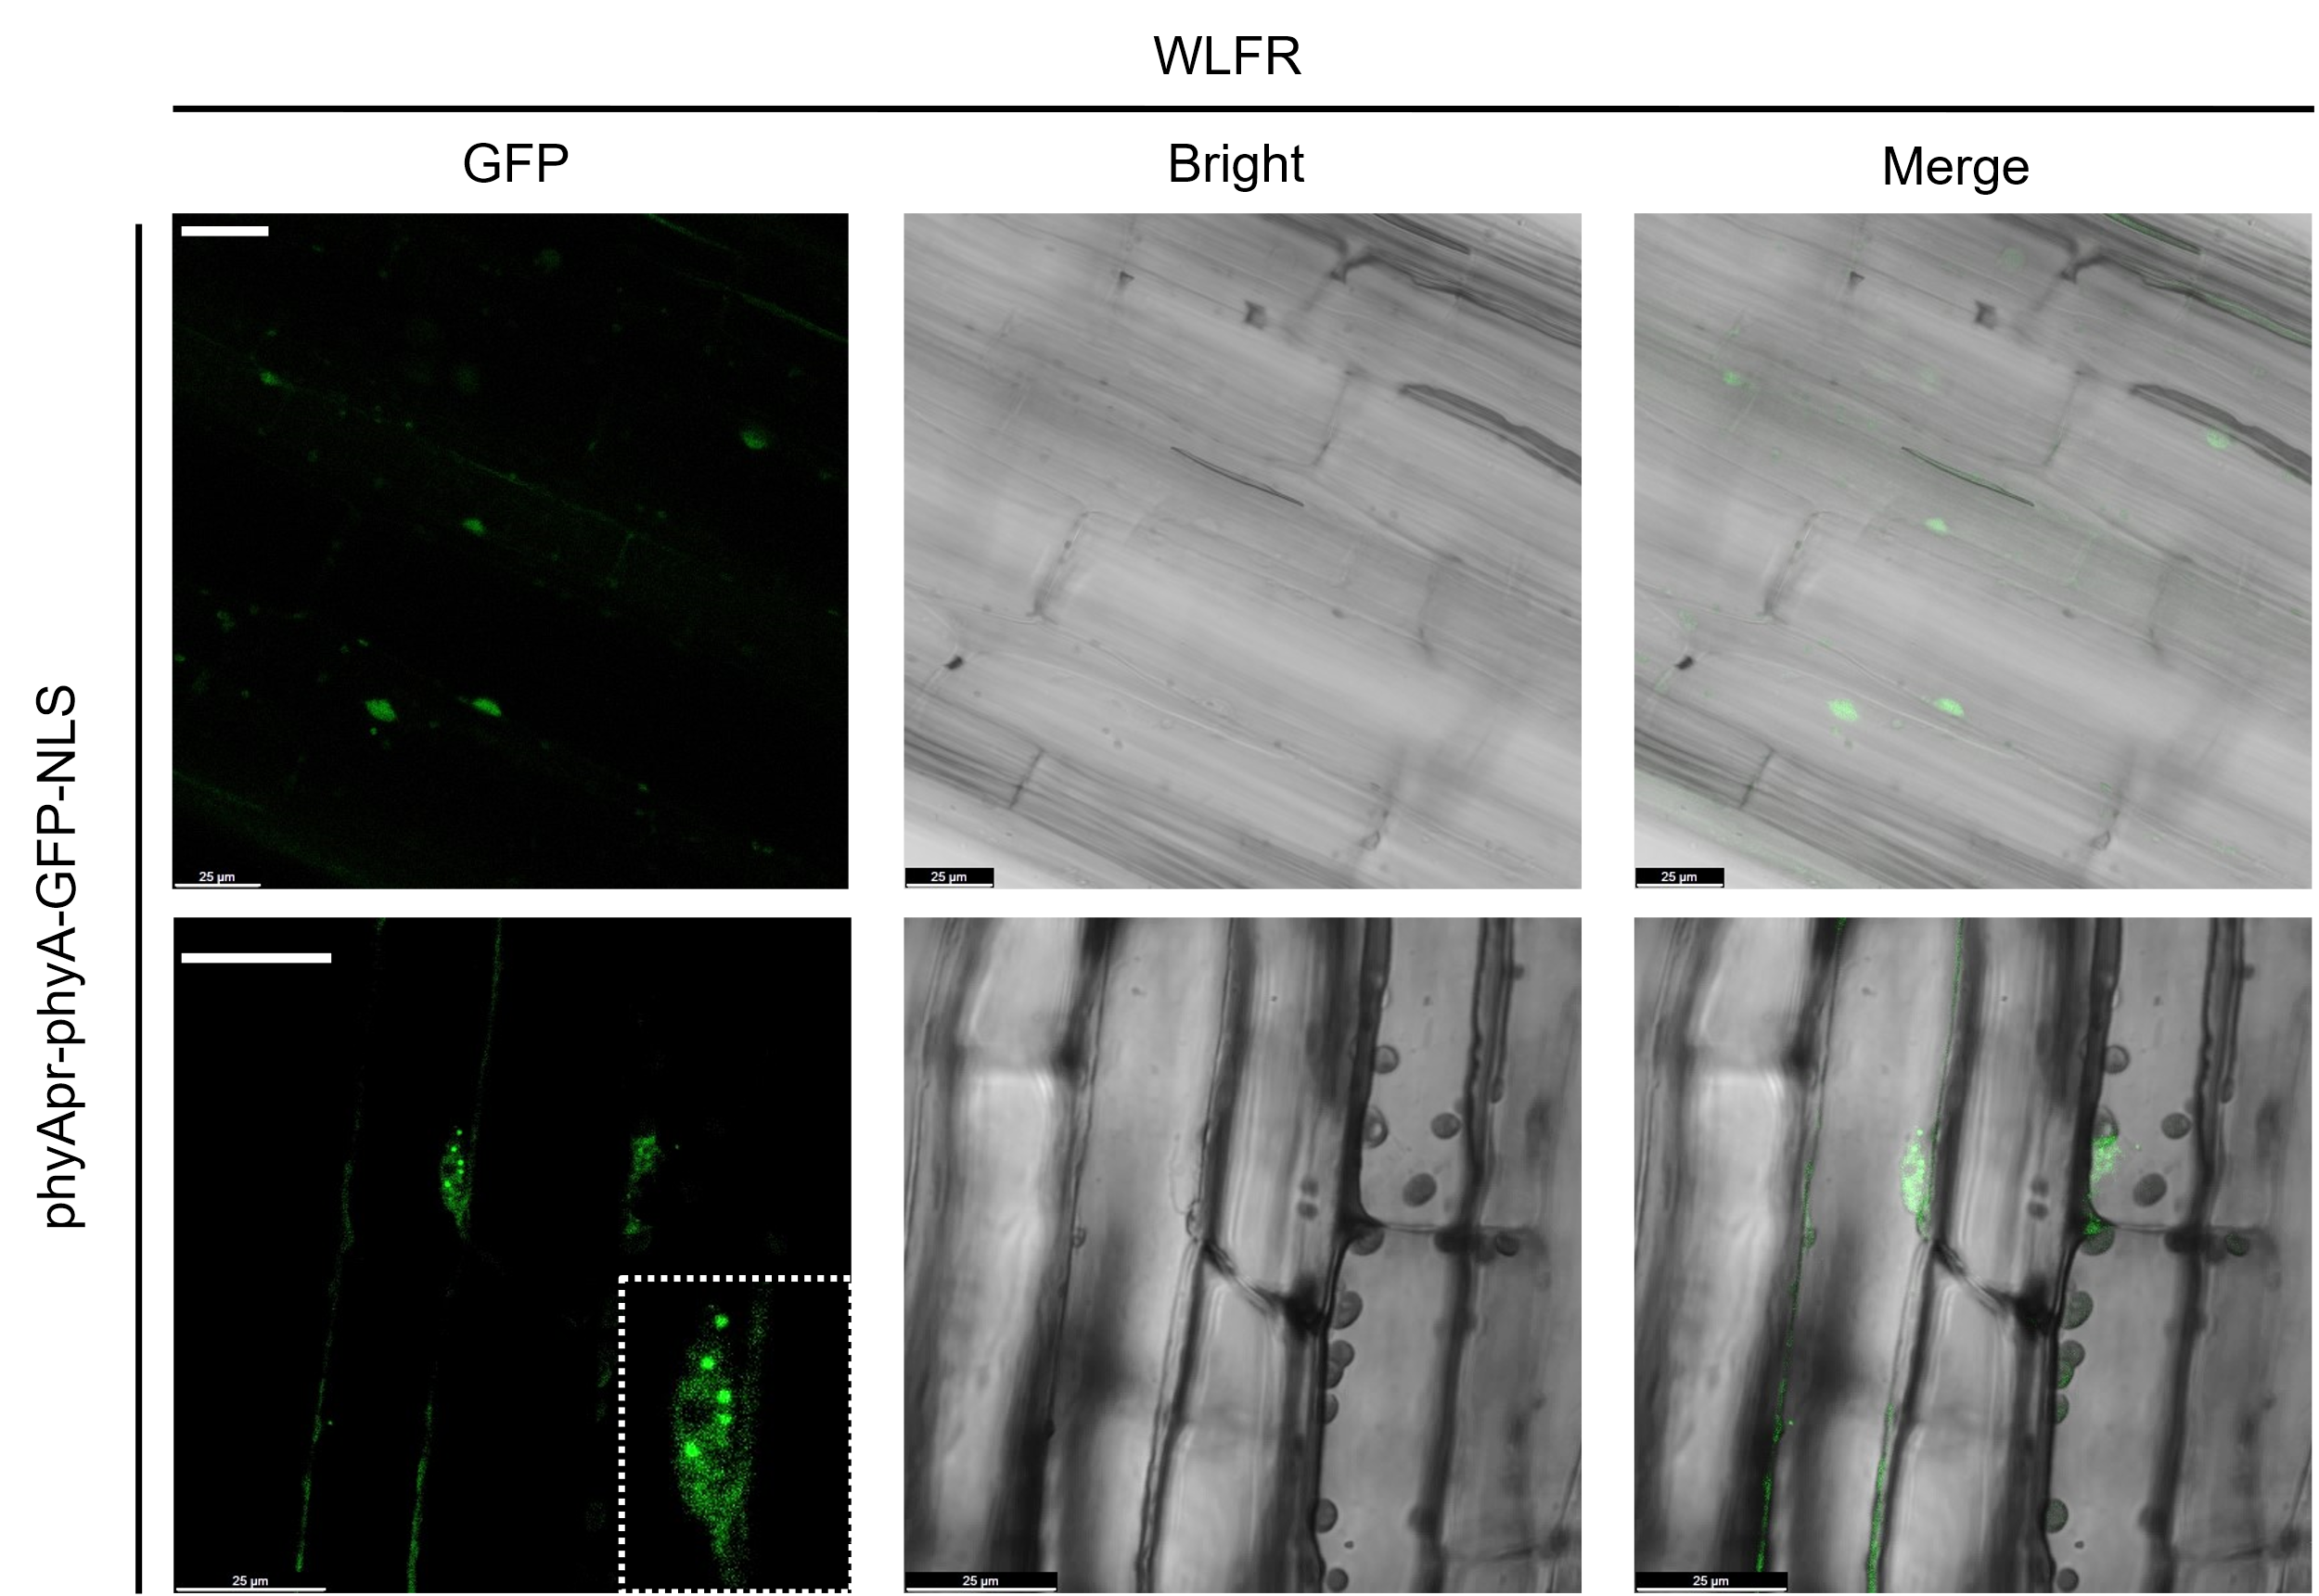


**S7 phyA-GFP-NLS accumulates in nuclei and photobodies in WLFR conditions.**

Images from the transgenic line *pPHYA::PHYA-sGFP-NLS*;*phyA-201* are shown. GFP signals were observed using a 488 nm laser, and images were acquired at ZT7 following 6 days of WLFR treatment. The scale bar indicates 25 μm. Representative images from three independent replicates are shown.
